# Supplementary material
Source: MDPI journal article supplement (https://www.mdpi.com/1424-8247/14/12/1323)

# **SUPPLEMENTARY MATERIAL FOR**

## **2-(Piperidin-4-yl)acetamides as potent inhibitors of soluble epoxide hydrolase with anti-inflammatory activity**

**Juan Martín-López<sup>1</sup>, Sandra Codony<sup>1</sup>, Clara Bartra<sup>2</sup>, Christophe Morisseau<sup>3</sup>, M. Isabel Loza<sup>4</sup>,**

**Coral Sanfeliu<sup>2</sup>, Bruce D. Hammock<sup>3</sup>, José Brea<sup>4,\*</sup> and Santiago Vázquez<sup>1,\*</sup>**

<sup>1</sup> Laboratori de Química Farmacèutica (Unitat Associada al CSIC), Facultat de Farmàcia i Ciències de l'Alimentació, and Institute of Biomedicine (IBUB), Universitat de Barcelona, Av. Joan XXIII, 27-31, 08028 Barcelona, Spain; juanxi.martin@gmail.com (J.M.-L.); sandra.codony@ub.edu (S.C.)

<sup>2</sup> Department of Entomology and Nematology and Comprehensive Cancer Center, University of California Davis, One Shields Avenue, Davis CA 95616, USA; chmorisseau@ucdavis.edu (C.M.); bdhammock@ucdavis.edu (B.D.H.)

<sup>3</sup> Drug Screening Platform/Biofarma Research Group, CIMUS Research Center. Departamento de Farmacología, Farmacia e Tecnología Farmacéutica. University of Santiago de Compostela (USC), 15782 Santiago de Compostela, Spain; mabel.loza@usc.es (M.I.L.)

\* Correspondences: pepo.brea@usc.es (J.B.); svazquez@ub.edu (S.V.); Tel.: +34-881-815-459 (J.B.); +34-934-024-533 (S.V.)

# Index

<sup>1</sup>H and <sup>13</sup>C NMR spectra of the synthesized compounds:

*t*-Butyl 4-(2-((9-methyl-5,6,8,9,10,11-hexahydro-7*H*-5,9:7,11-dimethanobenzo[9]annulen-7-yl)amino)-2-oxoethyl)piperidine-1-carboxylate, **4a** Page S1

*N*-(9-methyl-5,6,8,9,10,11-hexahydro-7*H*-5,9:7,11-dimethanobenzo[9]annulen-7-yl)-2-(piperidin-4-yl)acetamide, **5a** Page S2

2-(1-acetylpiperidin-4-yl)-*N*-(9-methyl-5,6,8,9,10,11-hexahydro-7*H*-5,9:7,11-dimethanobenzo[9]annulen-7-yl)acetamide, **6a** Page S3

2-[1-(isopropylsulfonyl)piperidin-4-yl]-*N*-(9-methyl-5,6,8,9,10,11-hexahydro-7*H*-5,9:7,11-dimethanobenzo[9]annulen-7-yl)acetamide, **6b** Page S4

*N*-(5,6,8,9,10,11-hexahydro-7*H*-5,9:7,11-dimethanobenzo[9]annulen-7-yl)-2-(piperidin-4-yl)acetamide, **5b** Page S5

*N*-(5,6,8,9,10,11-hexahydro-7*H*-5,9:7,11-dimethanobenzo[9]annulen-7-yl)-2-(1-(isopropylsulfonyl)piperidin-4-yl)acetamide, **6e** Page S6

*N*-(5,6,8,9,10,11-hexahydro-7*H*-5,9:7,11-dimethanobenzo[9]annulen-7-yl-9-*d*)-2-(piperidin-4-yl)acetamide, **5c** Page S7

*N*-(5,6,8,9,10,11-hexahydro-7*H*-5,9:7,11-dimethanobenzo[9]annulen-7-yl-9-*d*)-2-(1-(isopropylsulfonyl)piperidin-4-yl)acetamide, **6f** Page S8

*t*-butyl 4-(2-((9-fluoro-5,6,8,9,10,11-hexahydro-7*H*-5,9:7,11-dimethanobenzo[9]annulen-7-yl)amino)-2-oxoethyl)piperidine-1-carboxylate, **4d** Page S9

*N*-(9-fluoro-5,6,8,9,10,11-hexahydro-7*H*-5,9:7,11-dimethanobenzo[9]annulen-7-

|                                                                                                                                                                  |          |
|------------------------------------------------------------------------------------------------------------------------------------------------------------------|----------|
| yl)-2-(piperidin-4-yl)acetamide, <b>5d</b>                                                                                                                       | Page S10 |
| <i>N</i> -(9-fluoro-5,6,8,9,10,11-hexahydro-7 <i>H</i> -5,9:7,11-dimethanobenzo[9]annulen-7-yl)-2-(1-(isopropylsulfonyl)piperidin-4-yl)acetamide, <b>6c</b>      | Page S11 |
| <i>t</i> -butyl 4-(2-((9-chloro-5,6,8,9,10,11-hexahydro-7 <i>H</i> -5,9:7,11-dimethanobenzo[9]annulen-7-yl)amino)-2-oxoethyl)piperidine-1-carboxylate, <b>4e</b> | Page S12 |
| <i>N</i> -(9-chloro-5,6,8,9,10,11-hexahydro-7 <i>H</i> -5,9:7,11-dimethanobenzo[9]annulen-7-yl)-2-(piperidin-4-yl)acetamide hydrochloride, <b>5e</b>             | Page S13 |
| <i>N</i> -(9-chloro-5,6,8,9,10,11-hexahydro-7 <i>H</i> -5,9:7,11-dimethanobenzo[9]annulen-7-yl)-2-(1-(isopropylsulfonyl)piperidin-4-yl)acetamide, <b>6d</b>      | Page S14 |
| 2-(1-benzylpiperidin-4-yl)- <i>N</i> -(9-methyl-5,6,8,9,10,11-hexahydro-7 <i>H</i> -5,9:7,11-dimethanobenzo[9]annulen-7-yl)acetamide, <b>6g</b>                  | Page S15 |
| 2-(1-benzylpiperidin-4-yl)- <i>N</i> -(9-fluoro-5,6,8,9,10,11-hexahydro-7 <i>H</i> -5,9:7,11-dimethanobenzo[9]annulen-7-yl)acetamide, <b>6h</b>                  | Page S16 |
| 2-(1-(4-( <i>t</i> -butoxycarbonyl)phenyl)piperidin-4-yl)acetic acid, <b>9c</b>                                                                                  | Page S17 |
| 2-(1-(2-bromo-4-(methoxycarbonyl)phenyl)piperidin-4-yl)acetic acid, <b>9d</b>                                                                                    | Page S18 |
| 2-(1-(2-cyclopropyl-4-(methoxycarbonyl)phenyl)piperidin-4-yl)acetic acid, <b>9e</b>                                                                              | Page S19 |
| 2-(1-(4-acetylphenyl)piperidin-4-yl)- <i>N</i> -(9-fluoro-5,6,8,9,10,11-hexahydro-7 <i>H</i> -5,9:7,11-dimethanobenzo[9]annulen-7-yl)acetamide, <b>10a</b>       | Page S20 |
| 2-(1-(4-cyanophenyl)piperidin-4-yl)- <i>N</i> -(9-fluoro-5,6,8,9,10,11-hexahydro-7 <i>H</i> -5,9:7,11-dimethanobenzo[9]annulen-7-yl)acetamide, <b>10b</b>        | Page S21 |
| 4-(4-(2-((9-fluoro-5,6,8,9,10,11-hexahydro-7 <i>H</i> -5,9:7,11-dimethanobenzo[9]annulen-                                                                        |          |

7-yl)amino)-2-oxoethyl)piperidin-1-yl)benzoic acid, **10c**

Page S22

3-cyclopropyl-4-(4-(2-((9-fluoro-5,6,8,9,10,11-hexahydro-7*H*-5,9:7,11-dimethanobenzo

[9]annulen-7-yl)amino)-2-oxoethyl)piperidin-1-yl)benzoic acid, **10d**

Page S23

4-(4-(2-((9-chloro-5,6,8,9,10,11-hexahydro-7*H*-5,9:7,11-dimethanobenzo[9]annulen-

7-yl)amino)-2-oxoethyl)piperidin-1-yl)benzoic acid, **10e**

Page S24

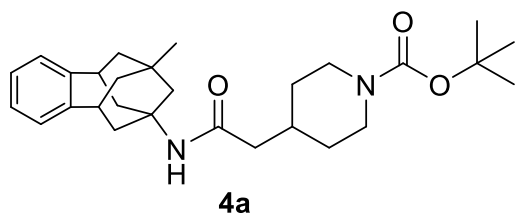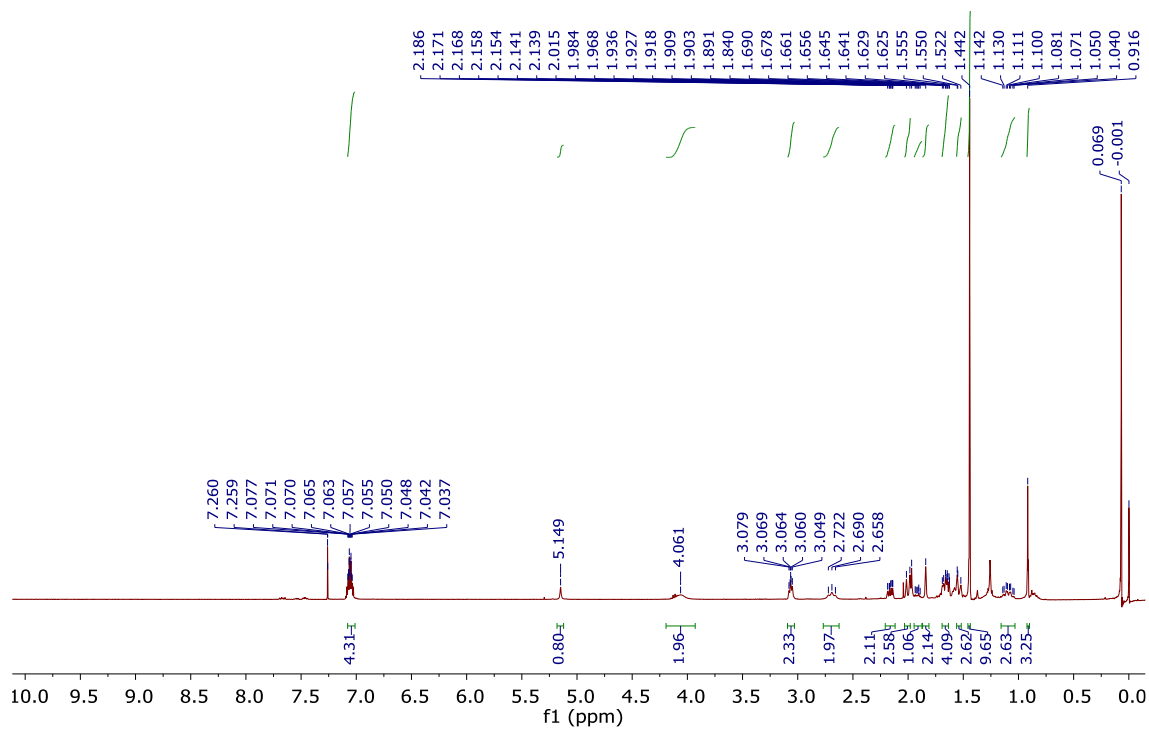

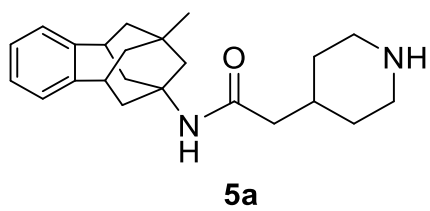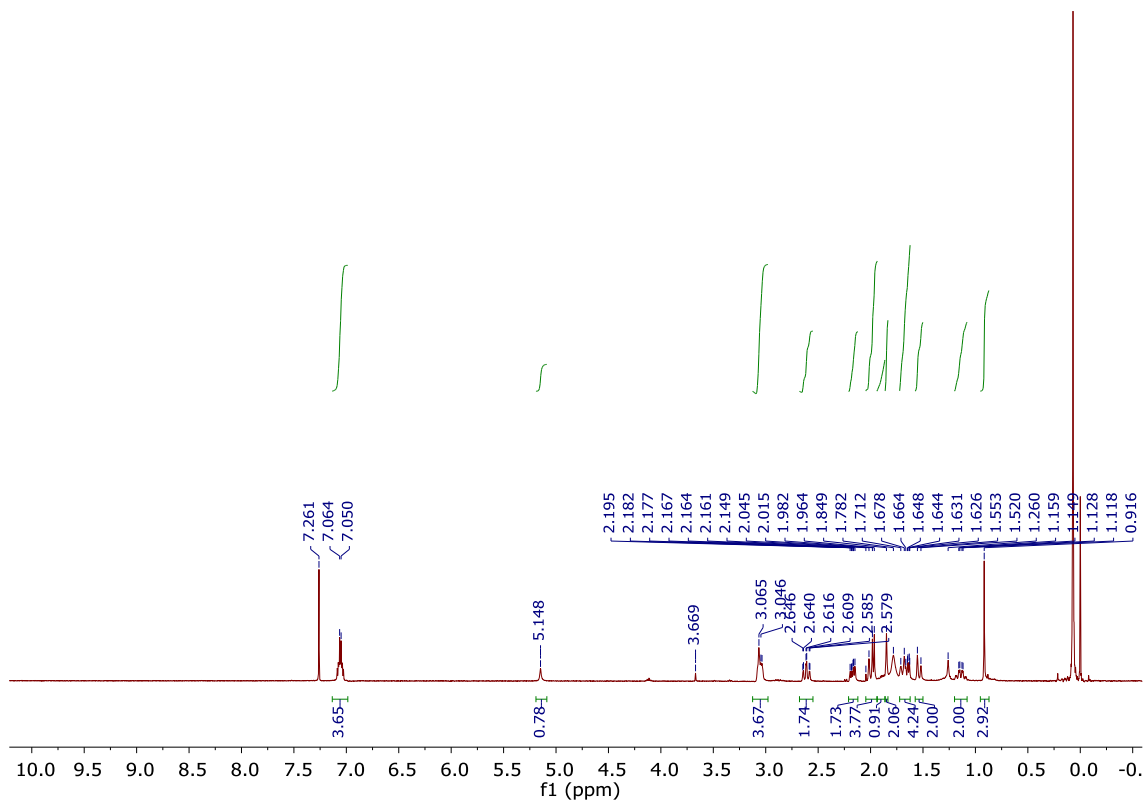

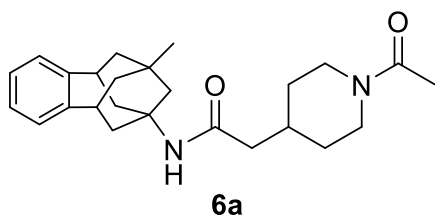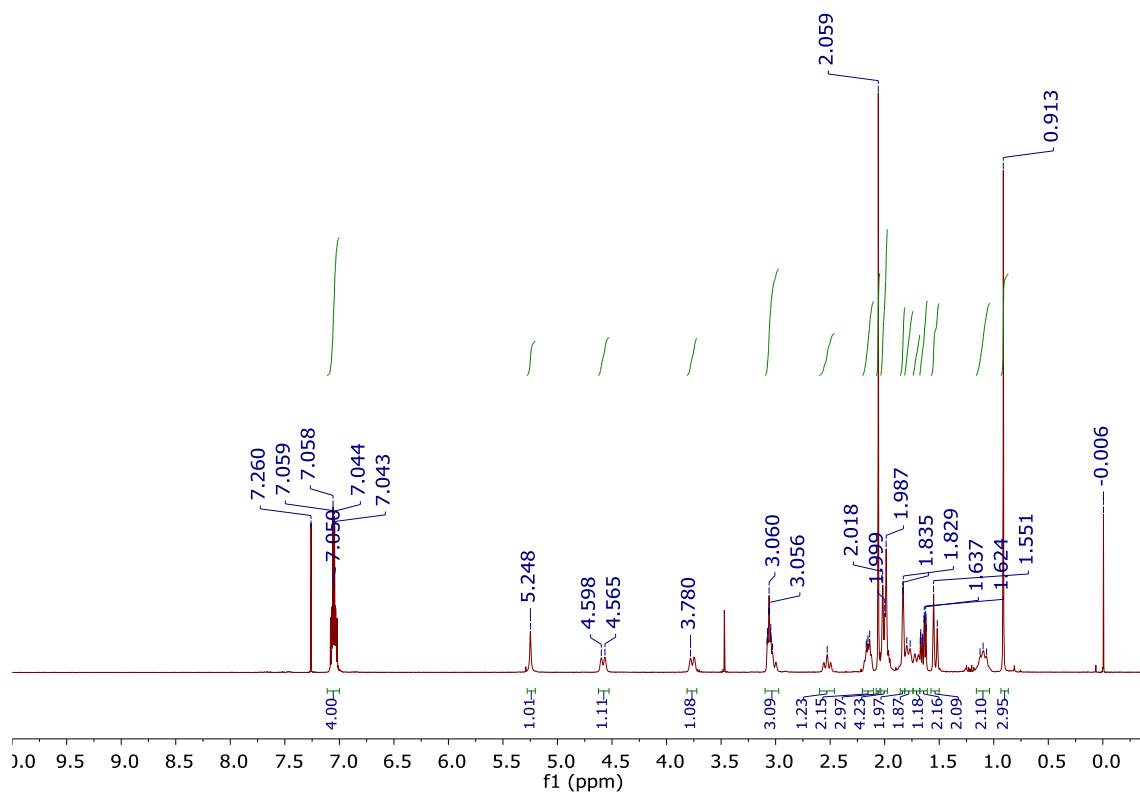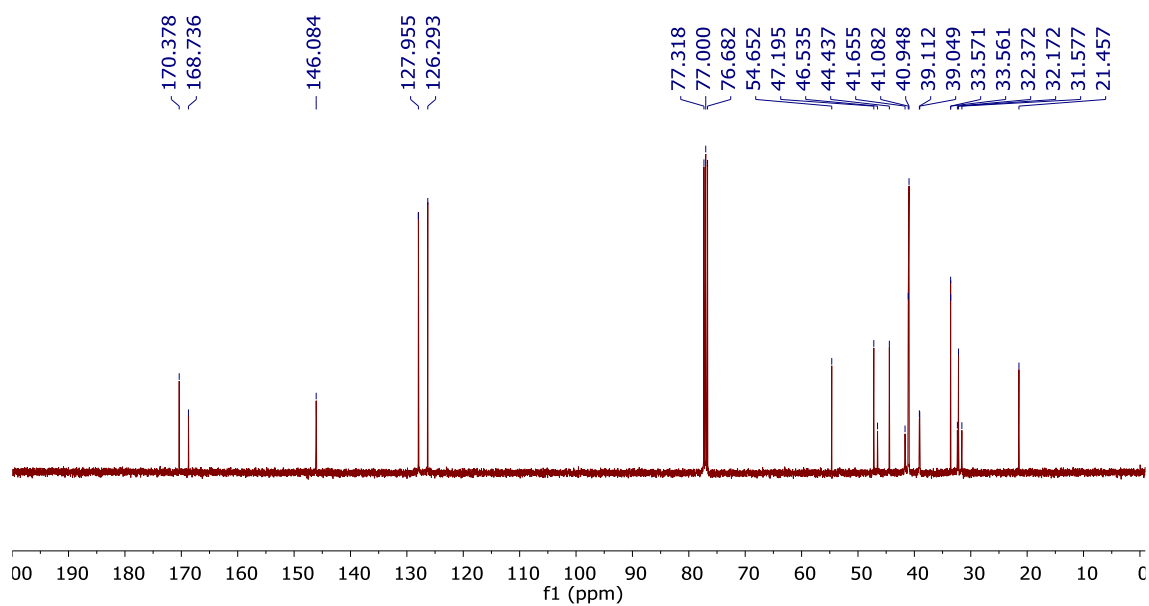

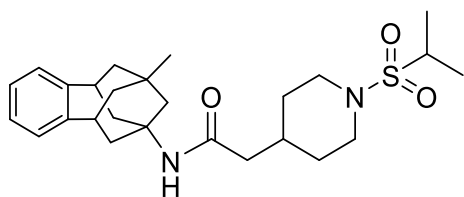

**6b**

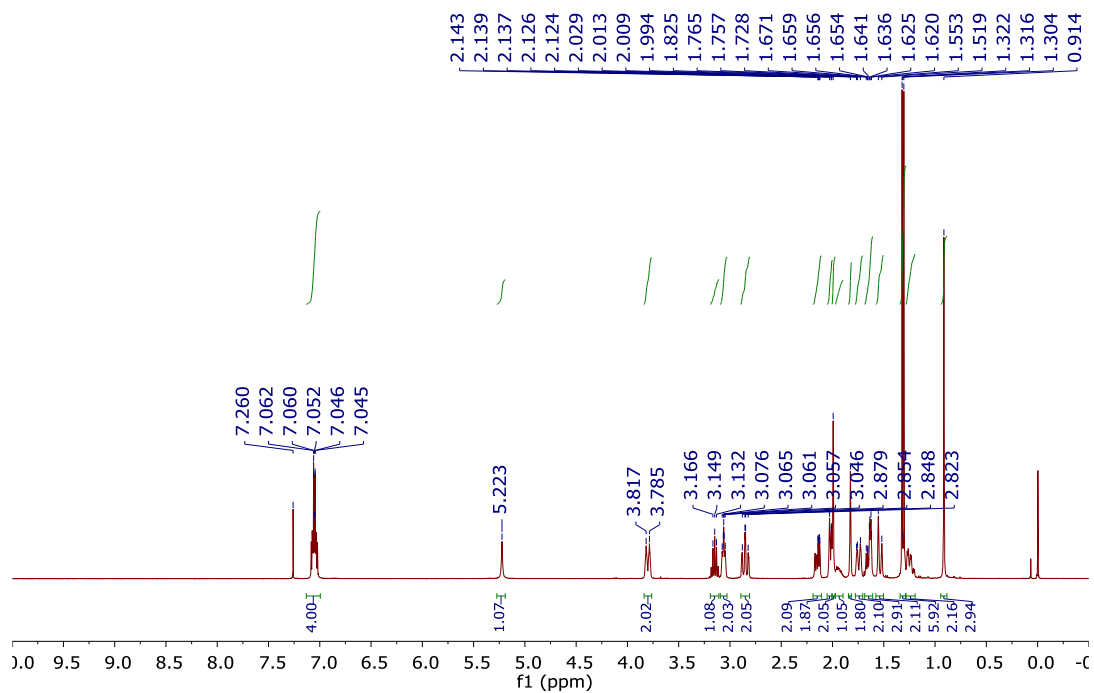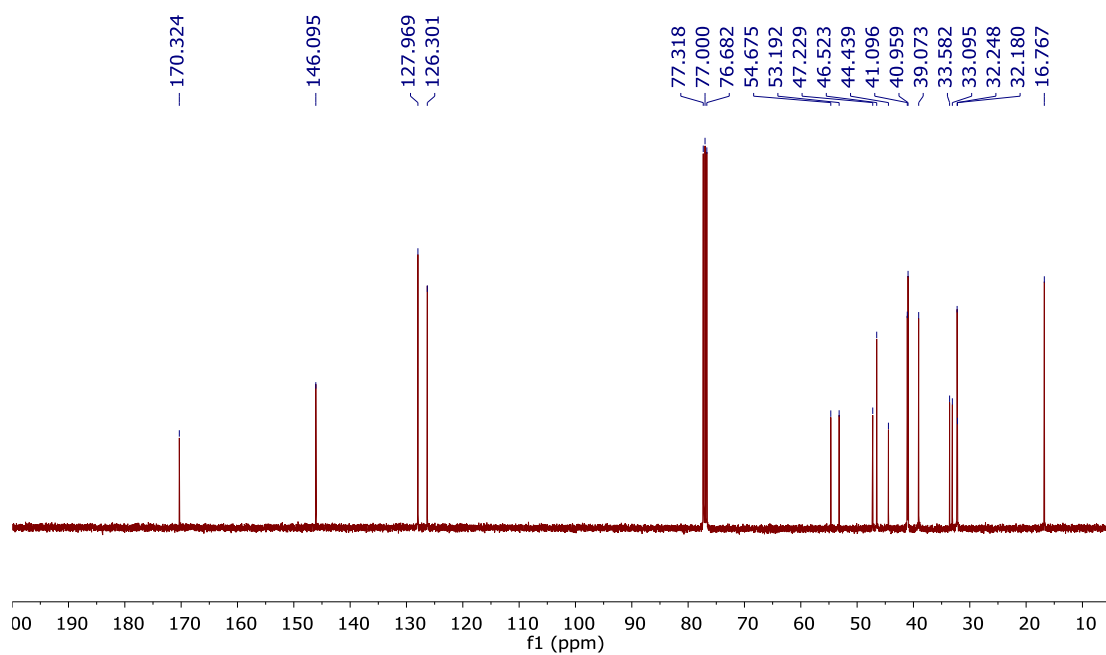



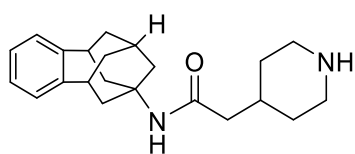

**5b**

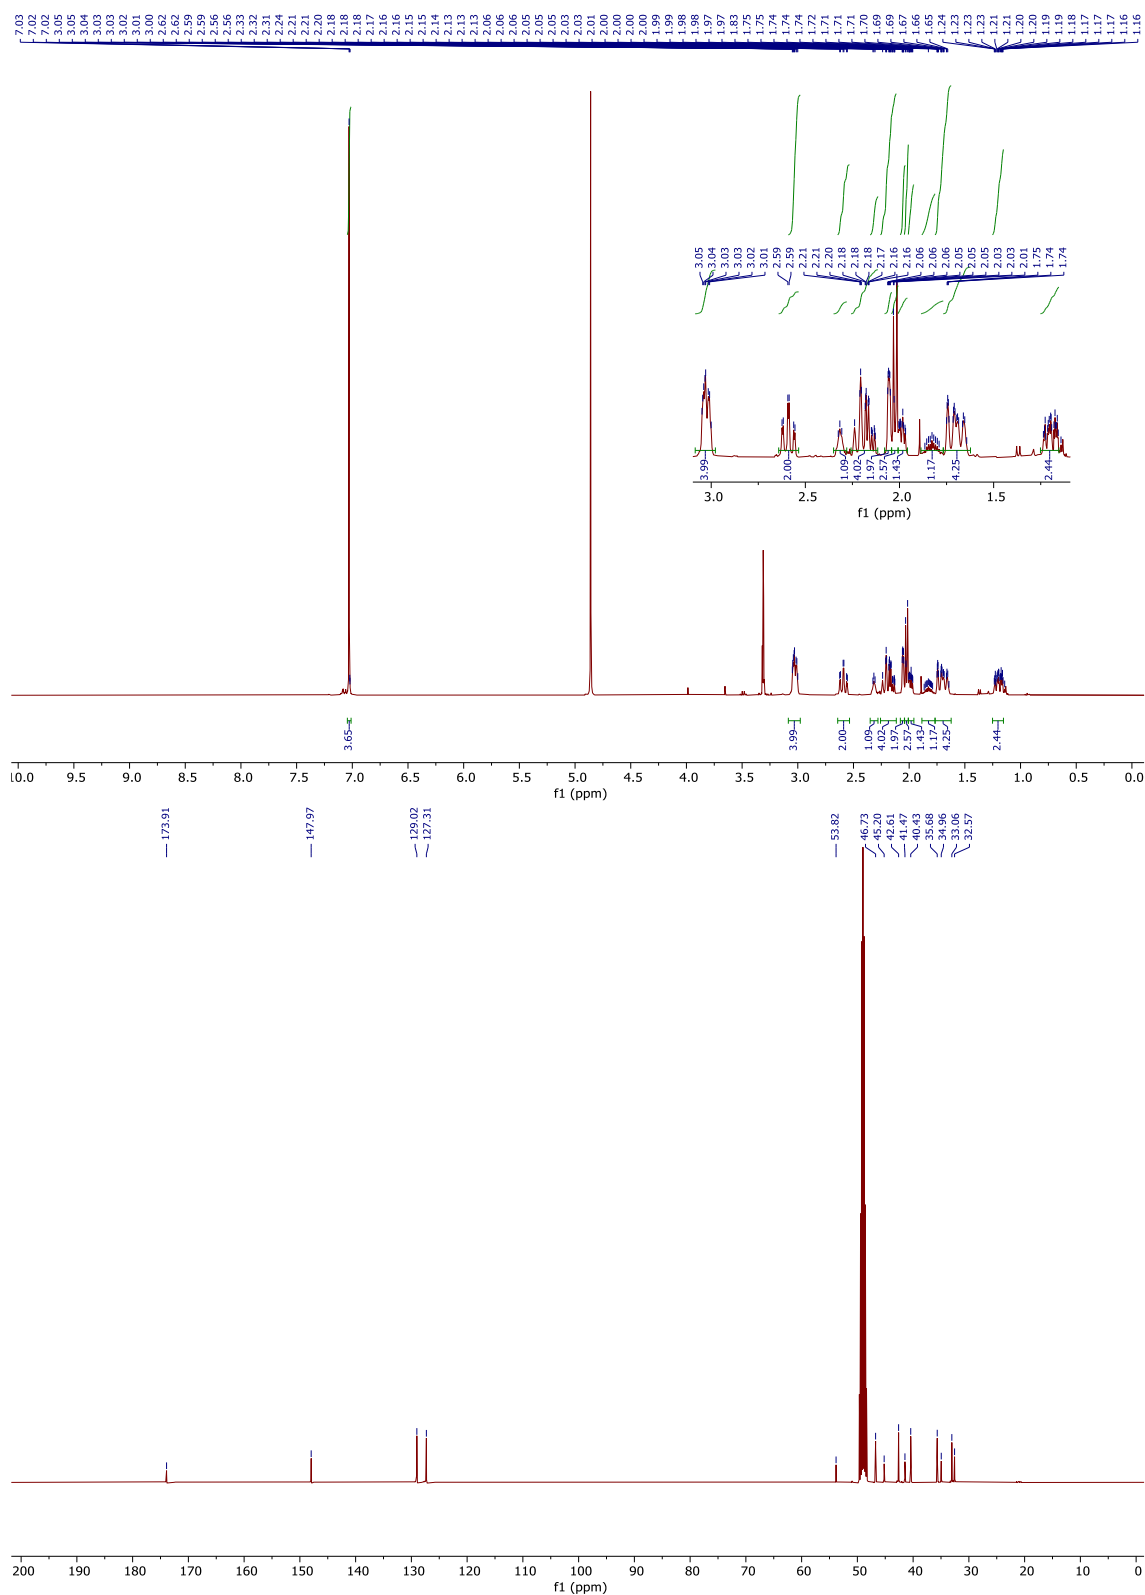

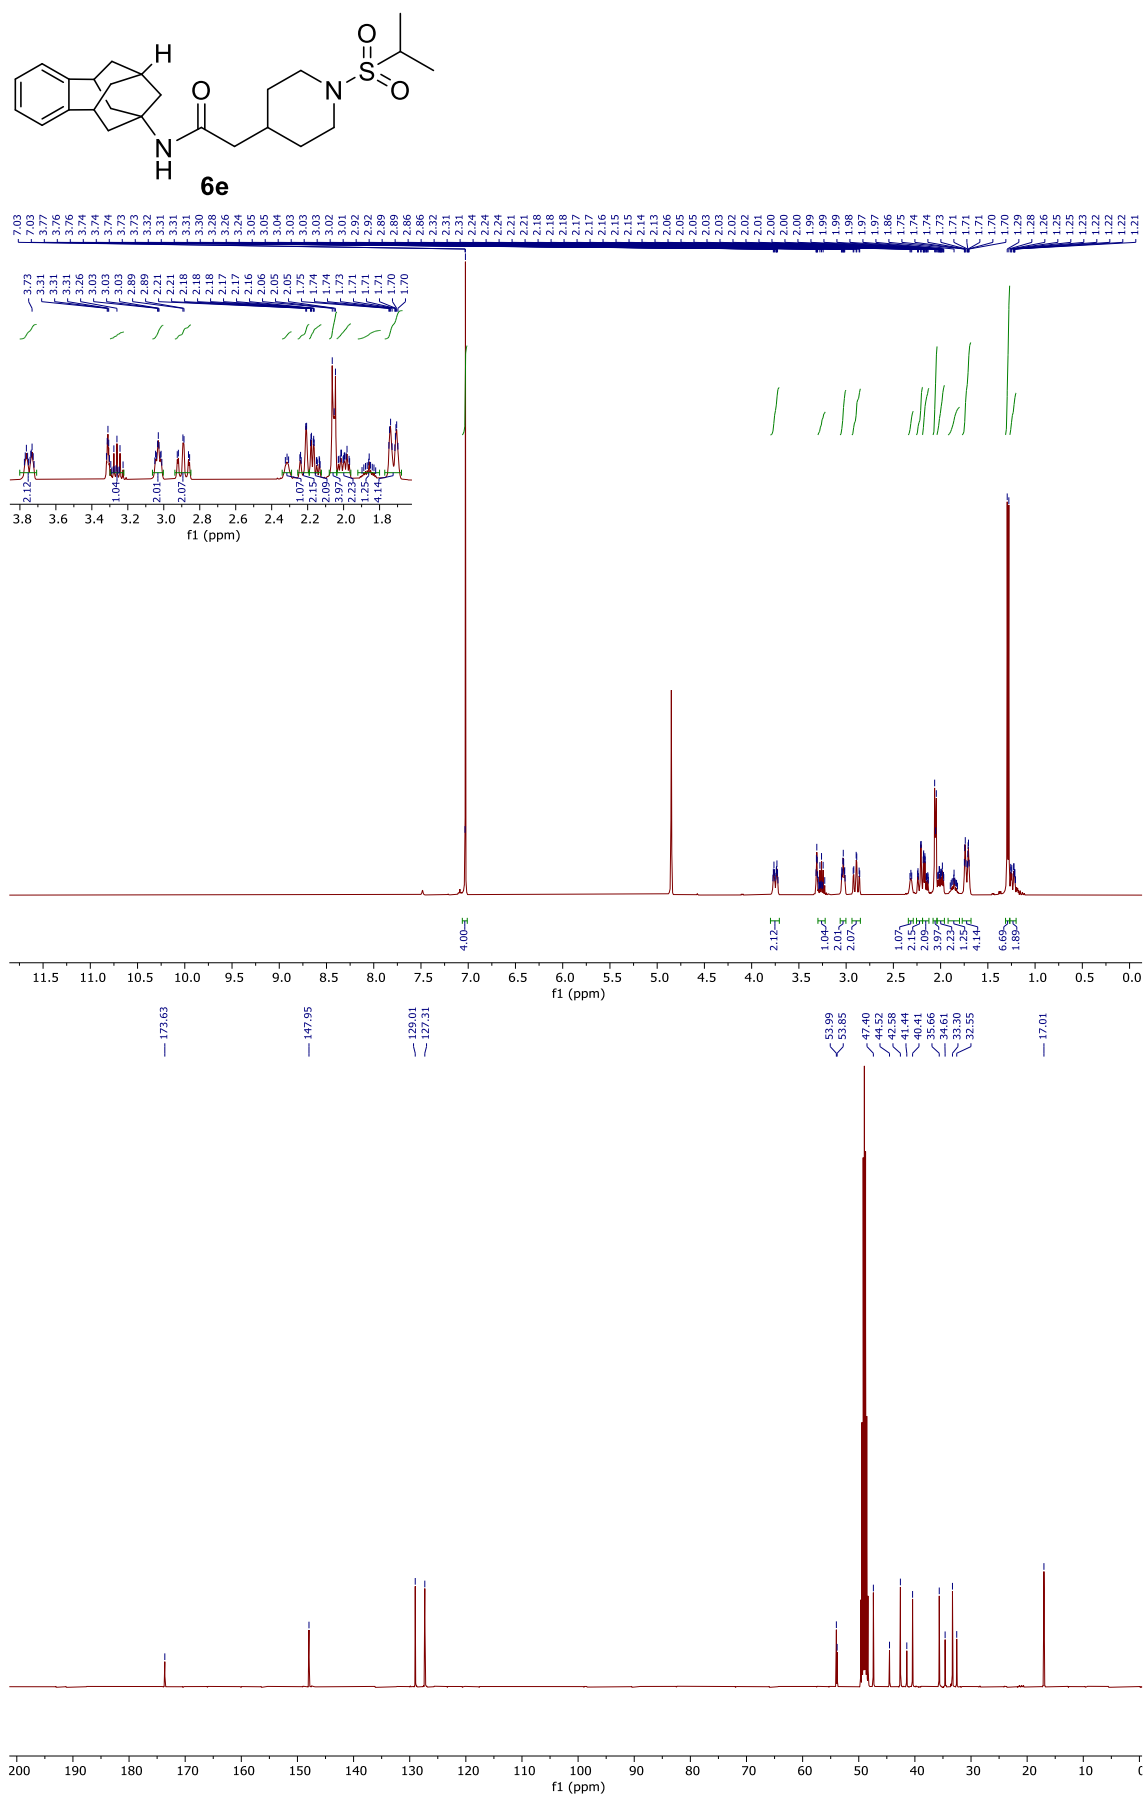

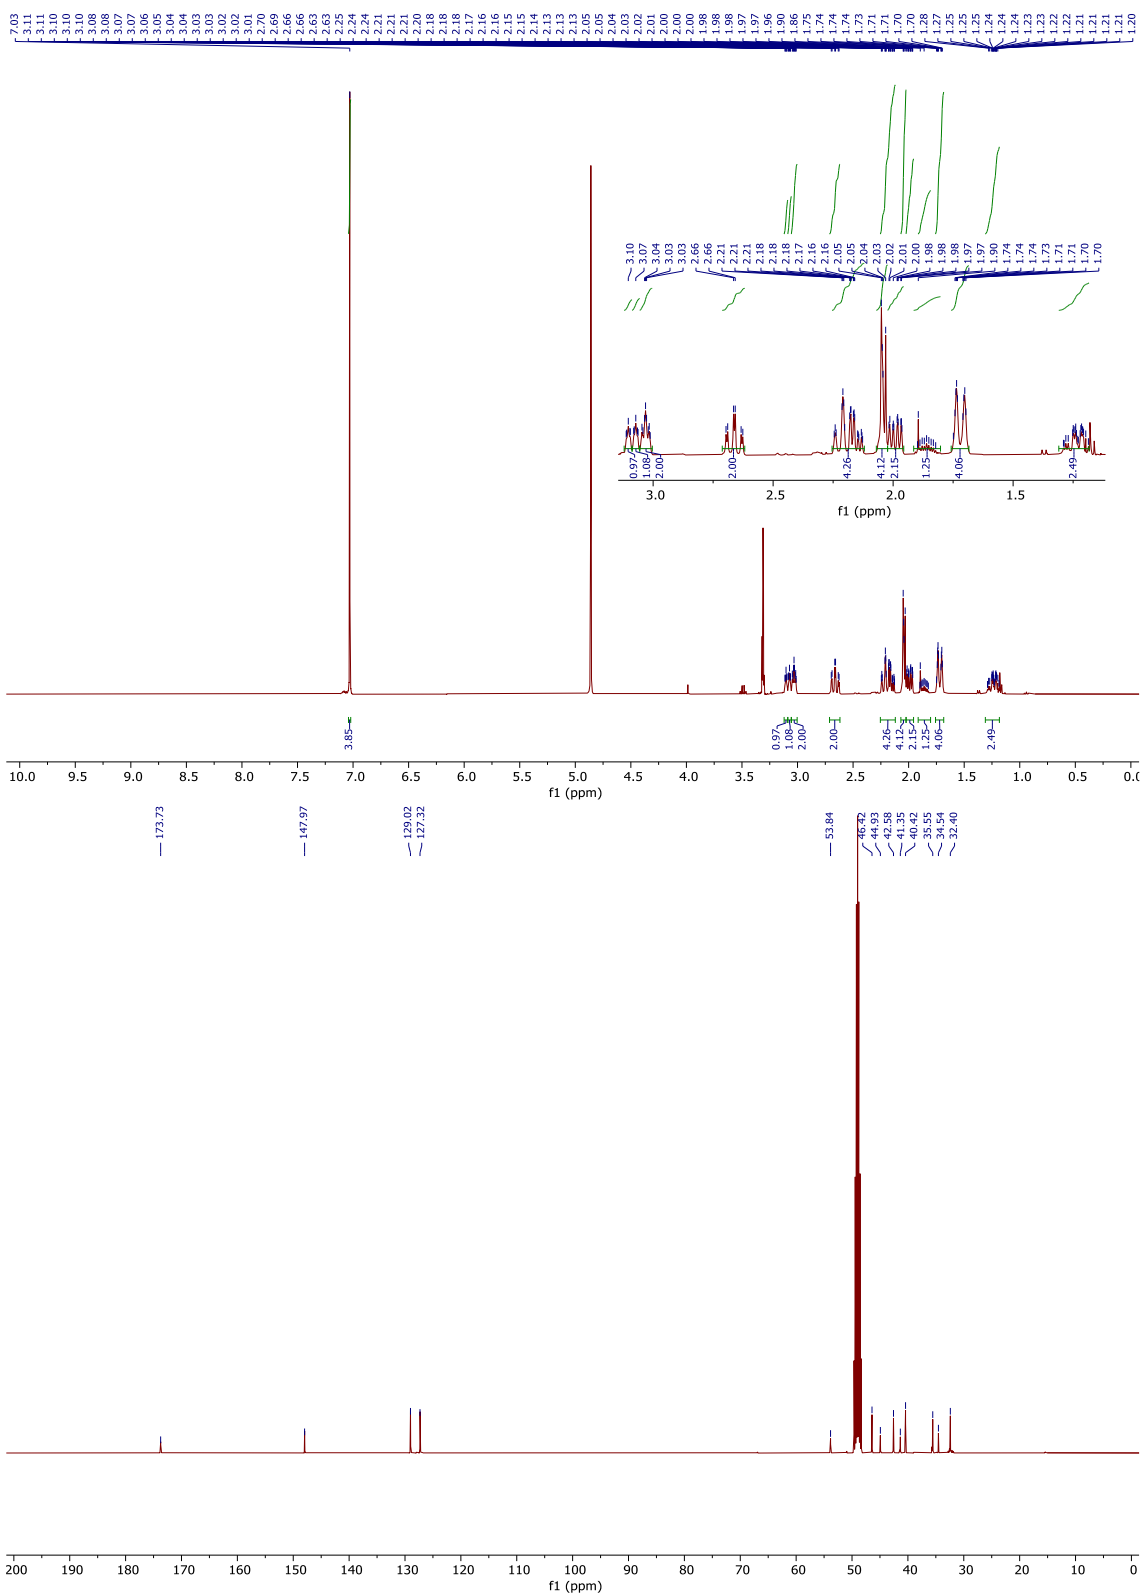

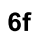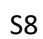

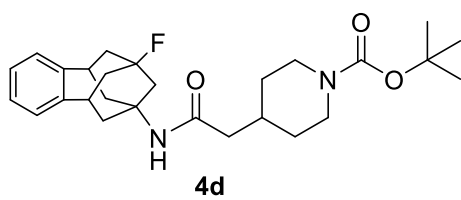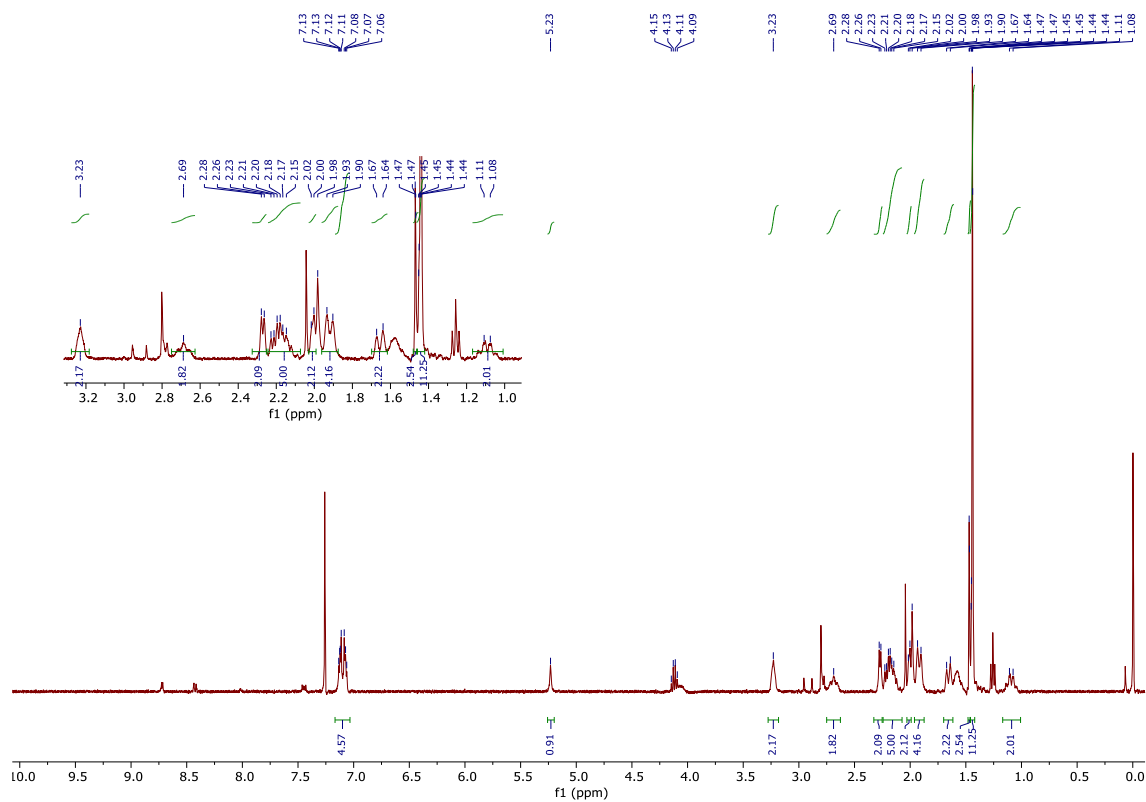

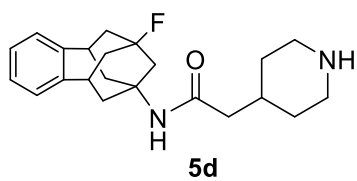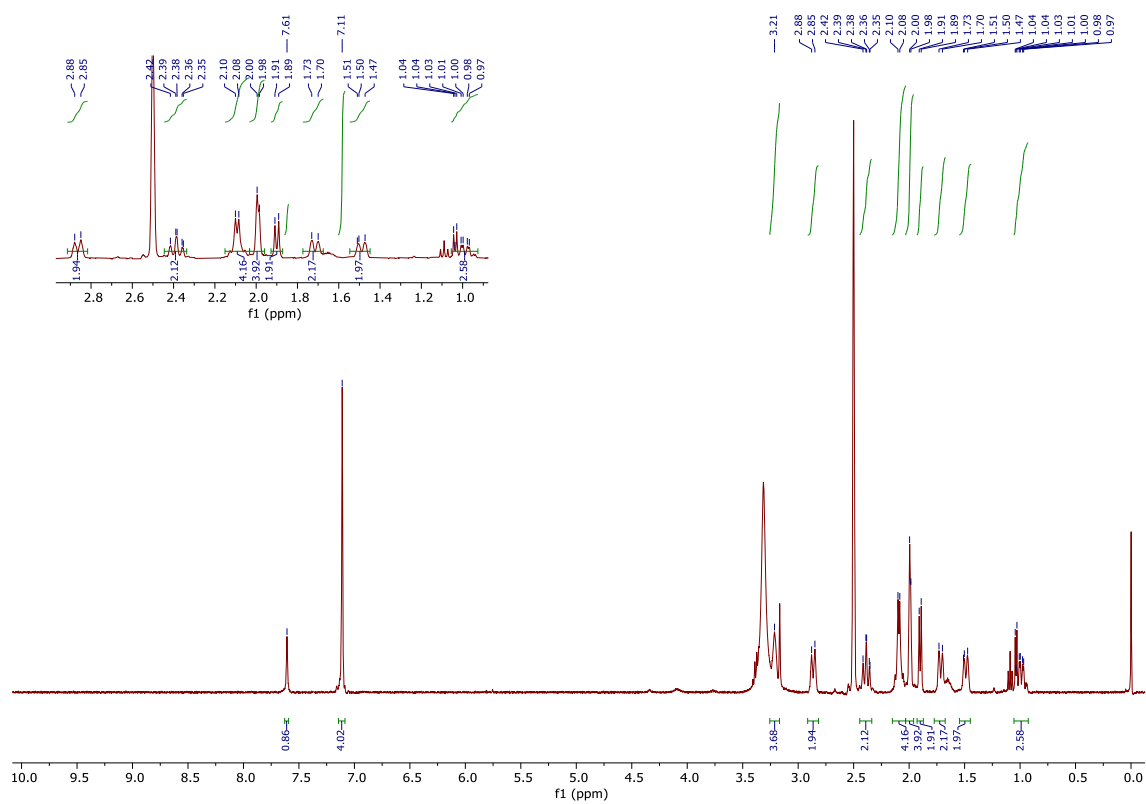

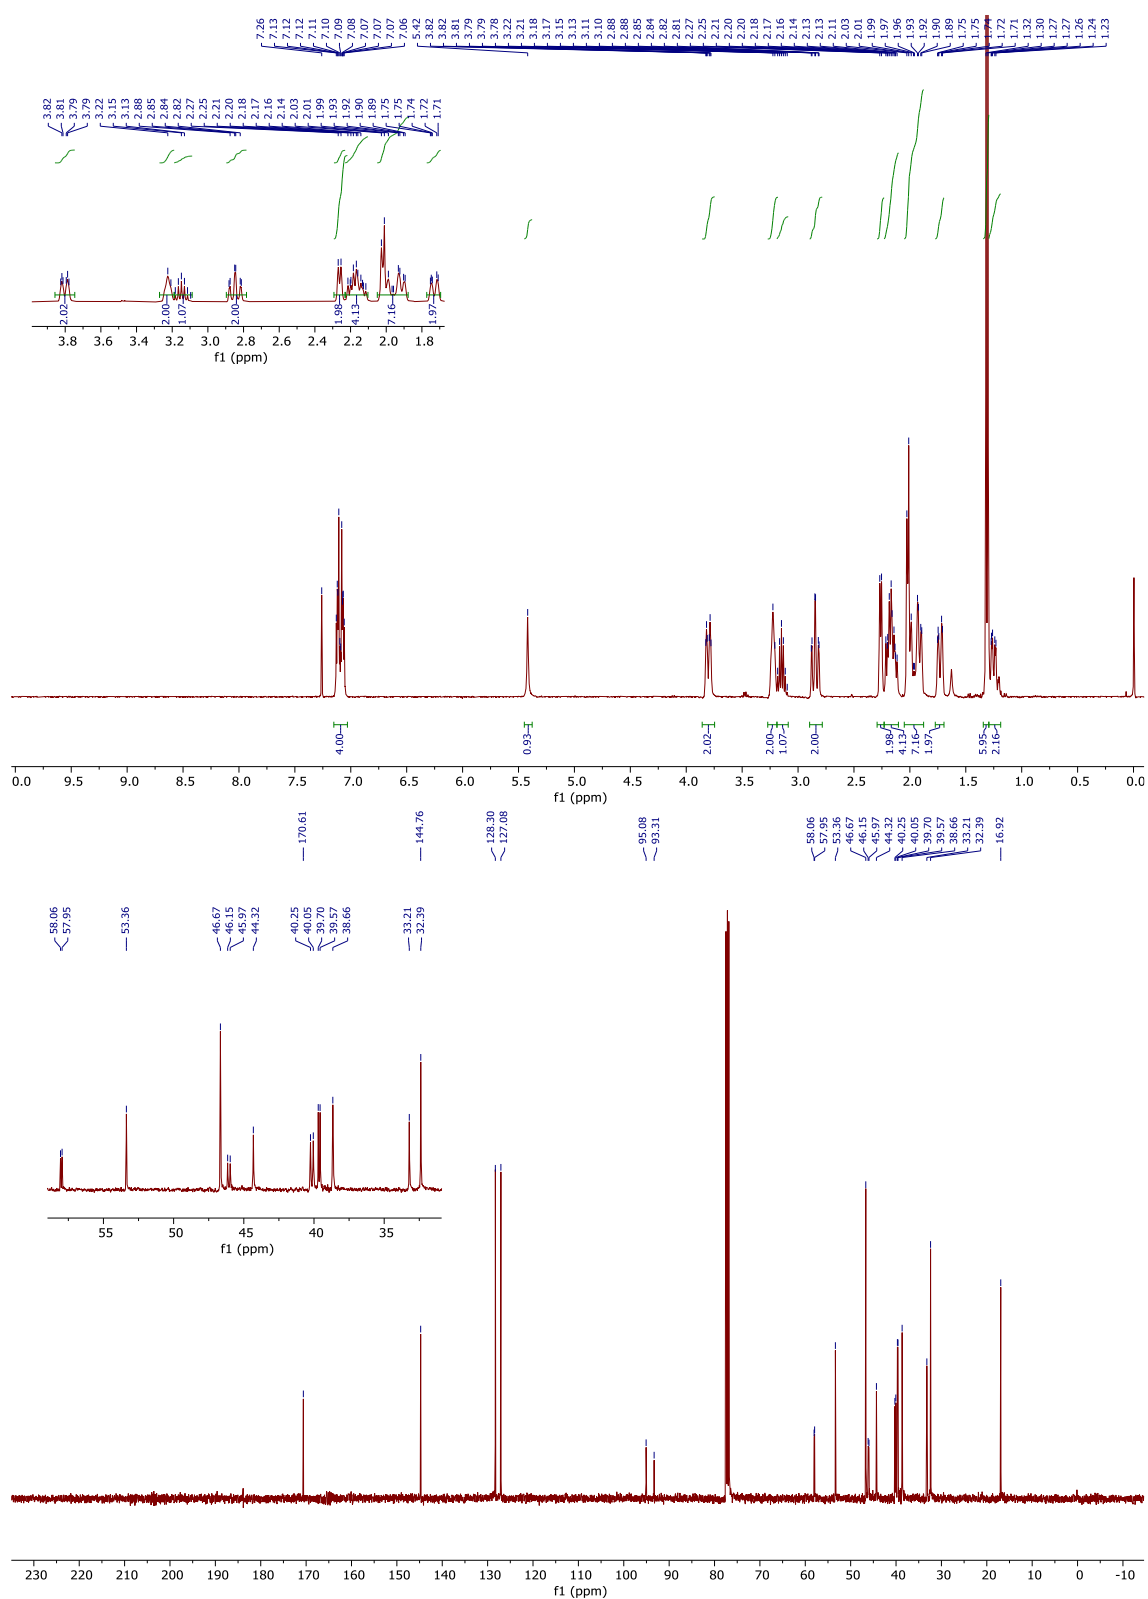

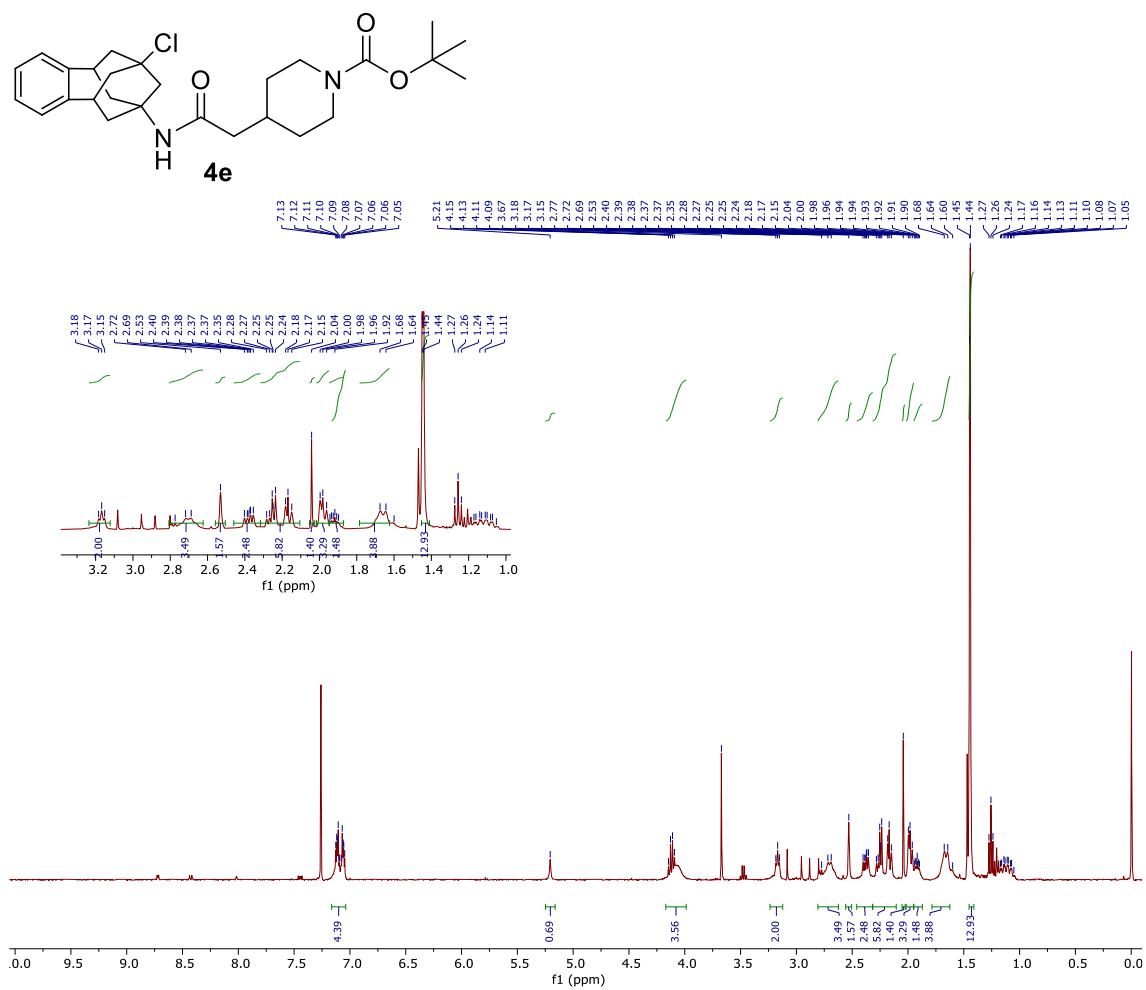



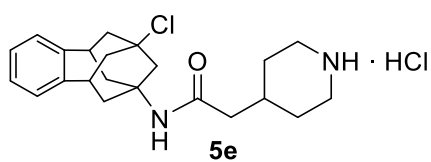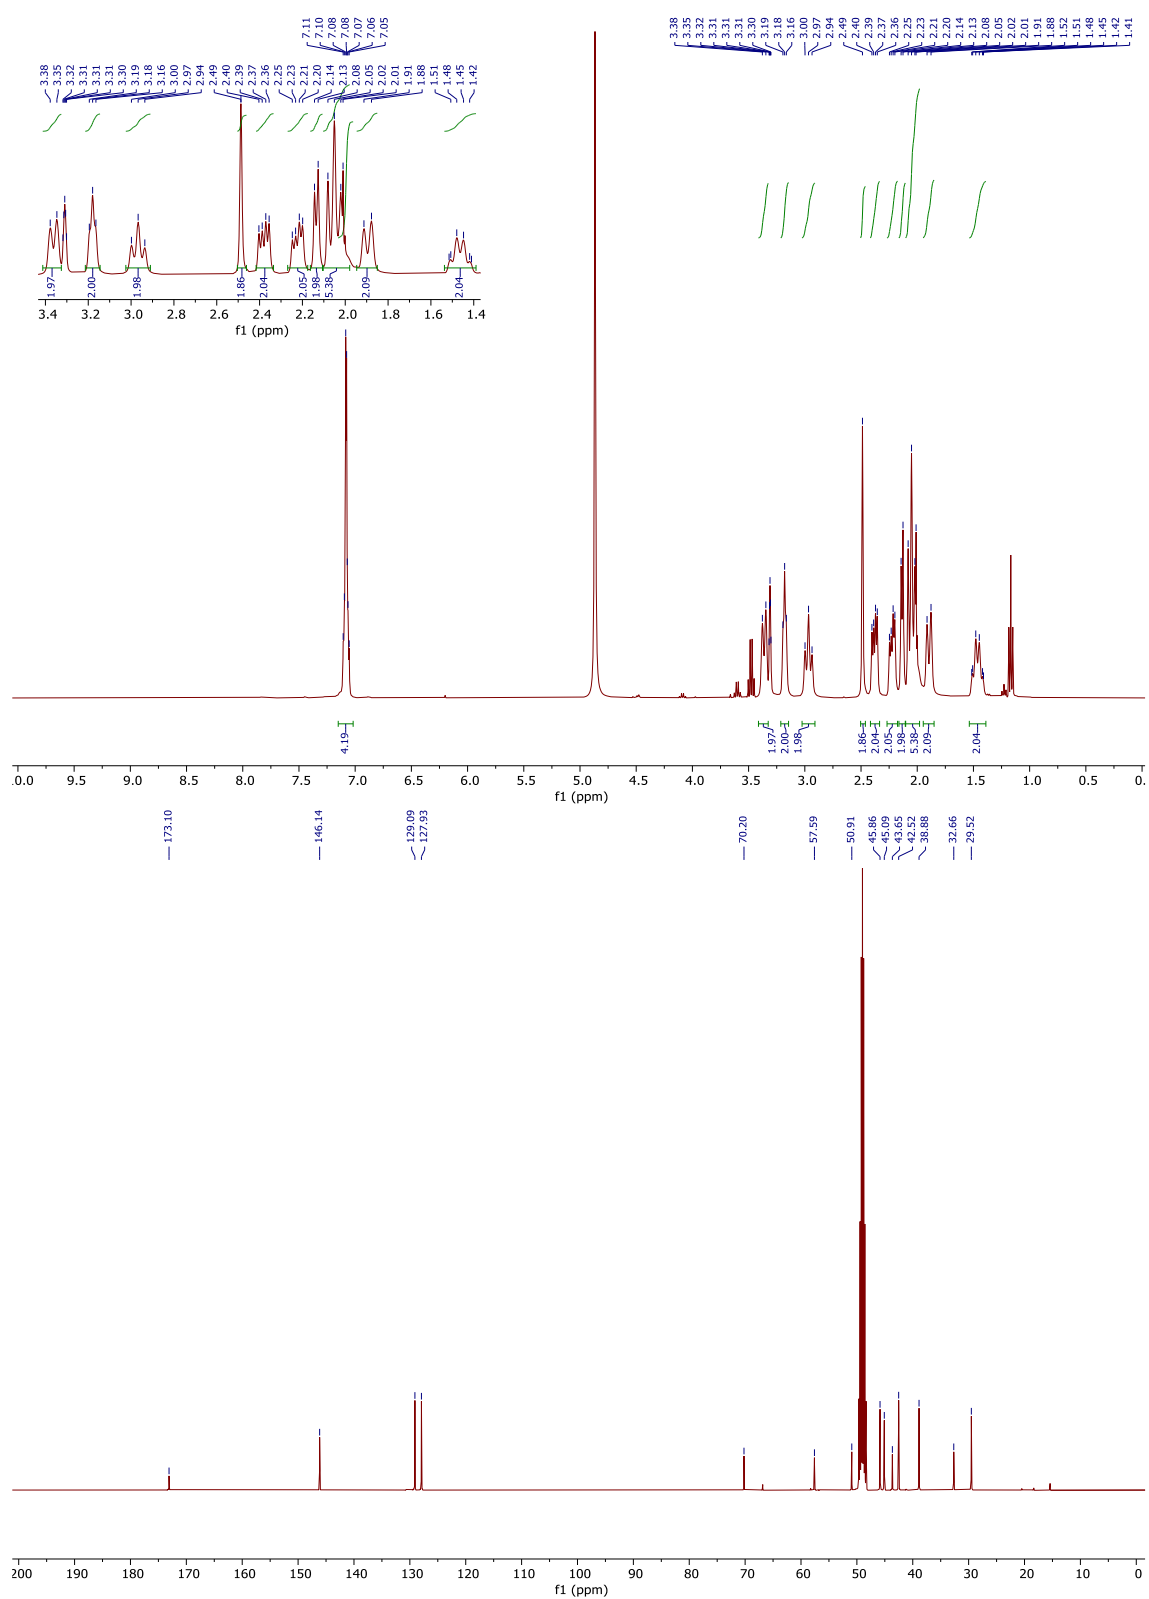

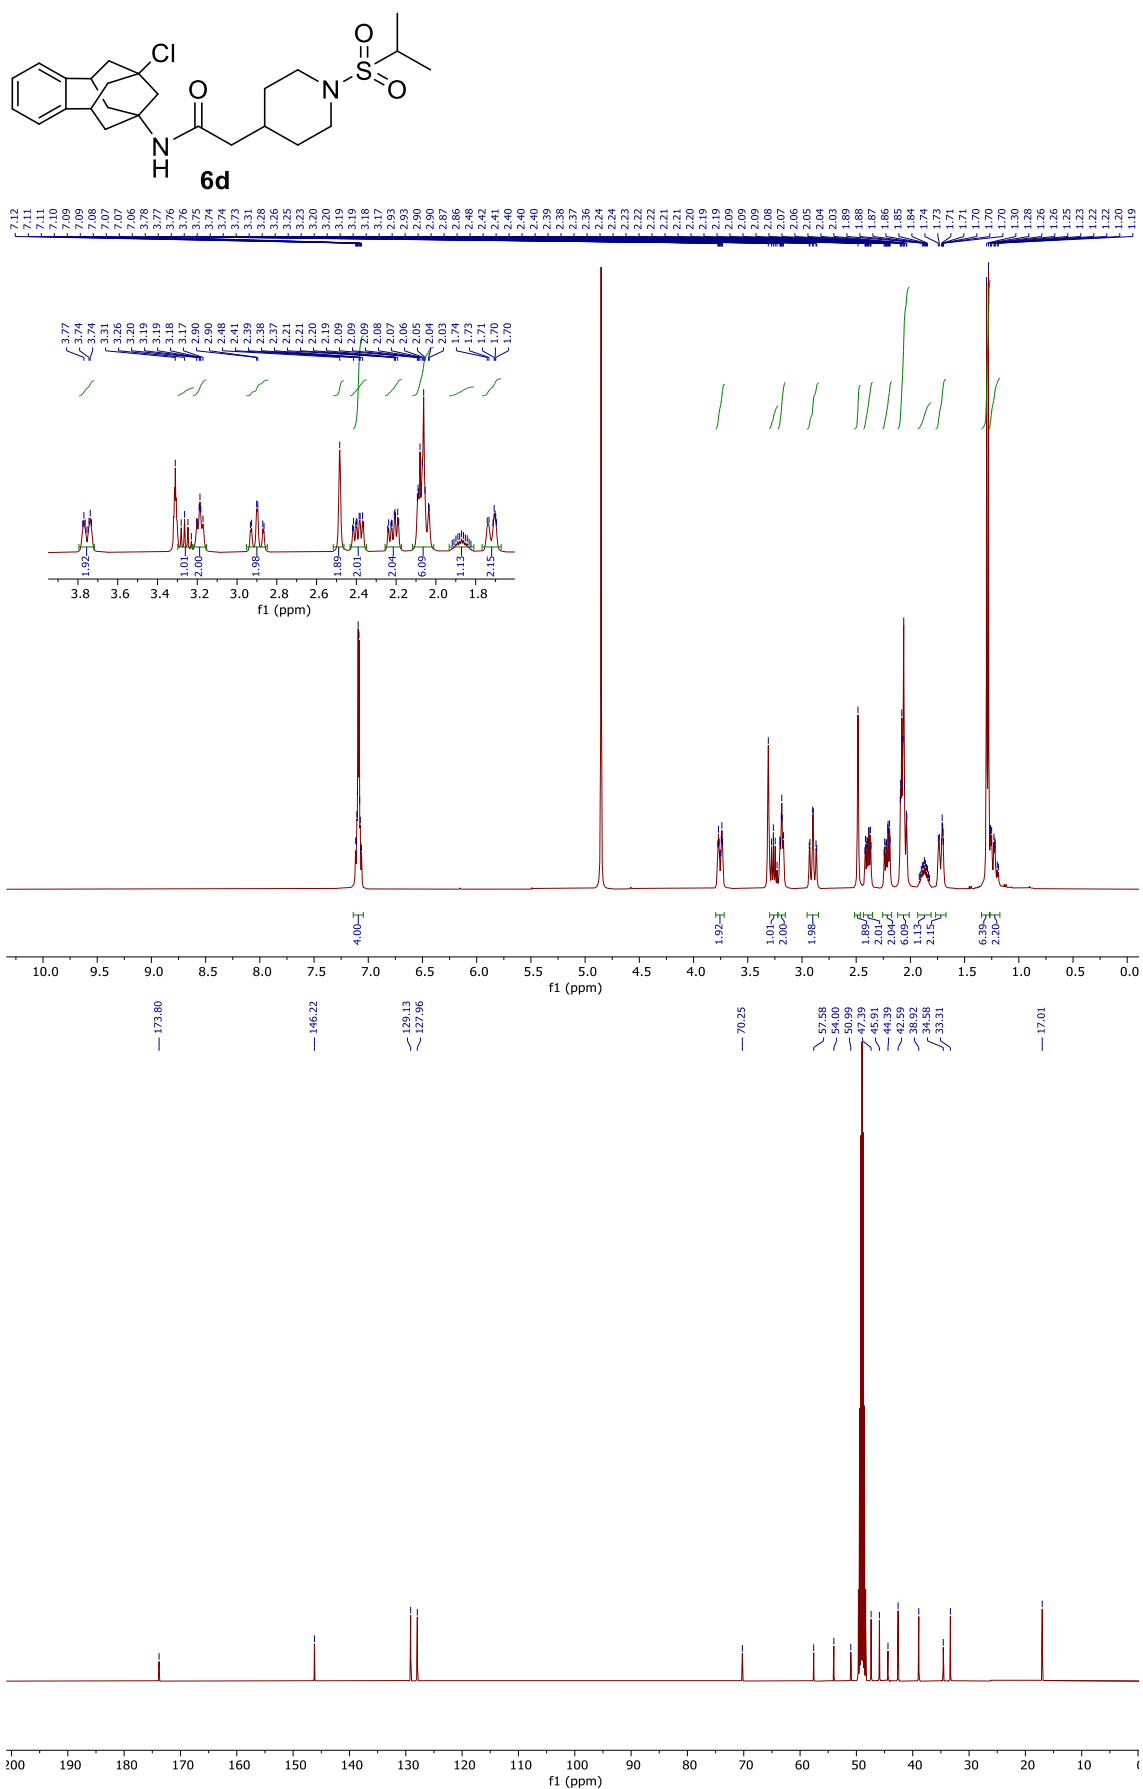

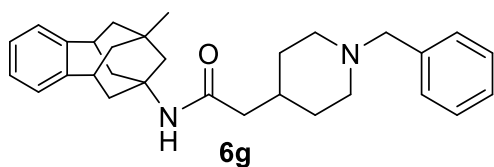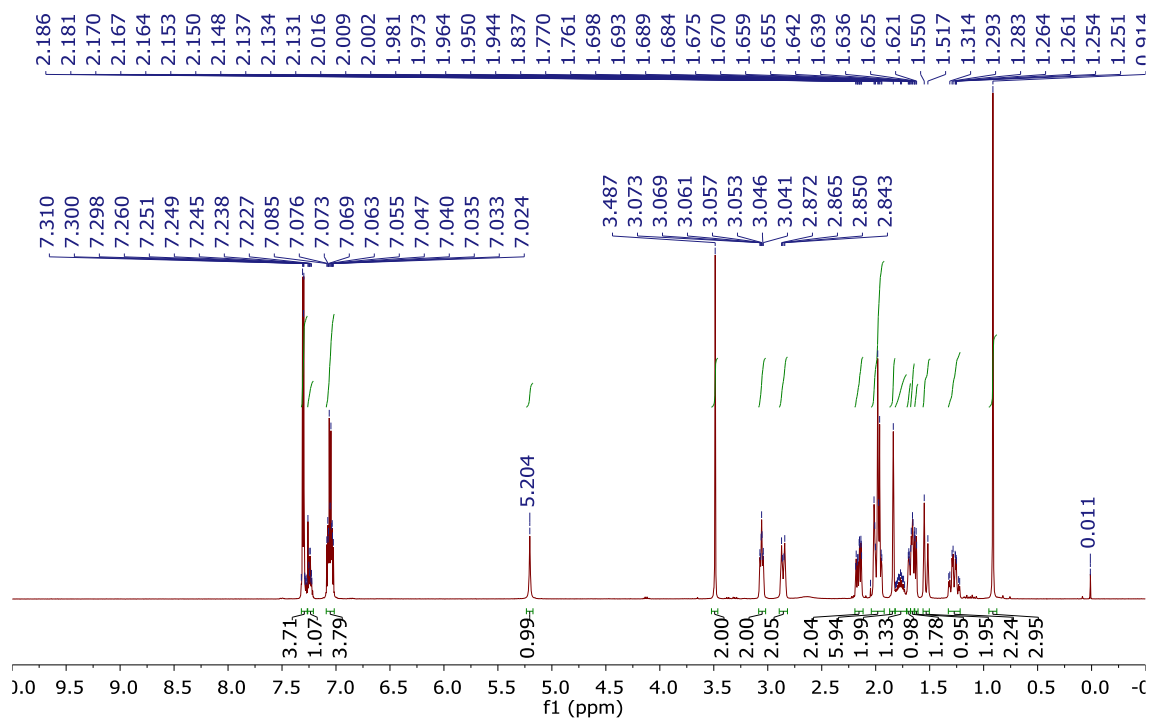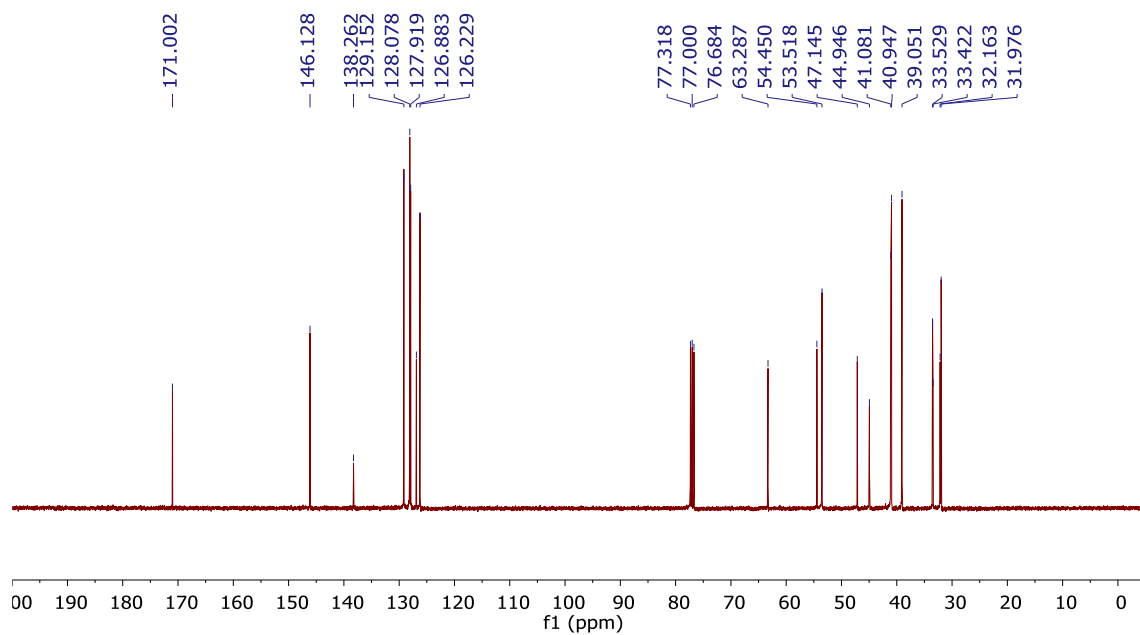

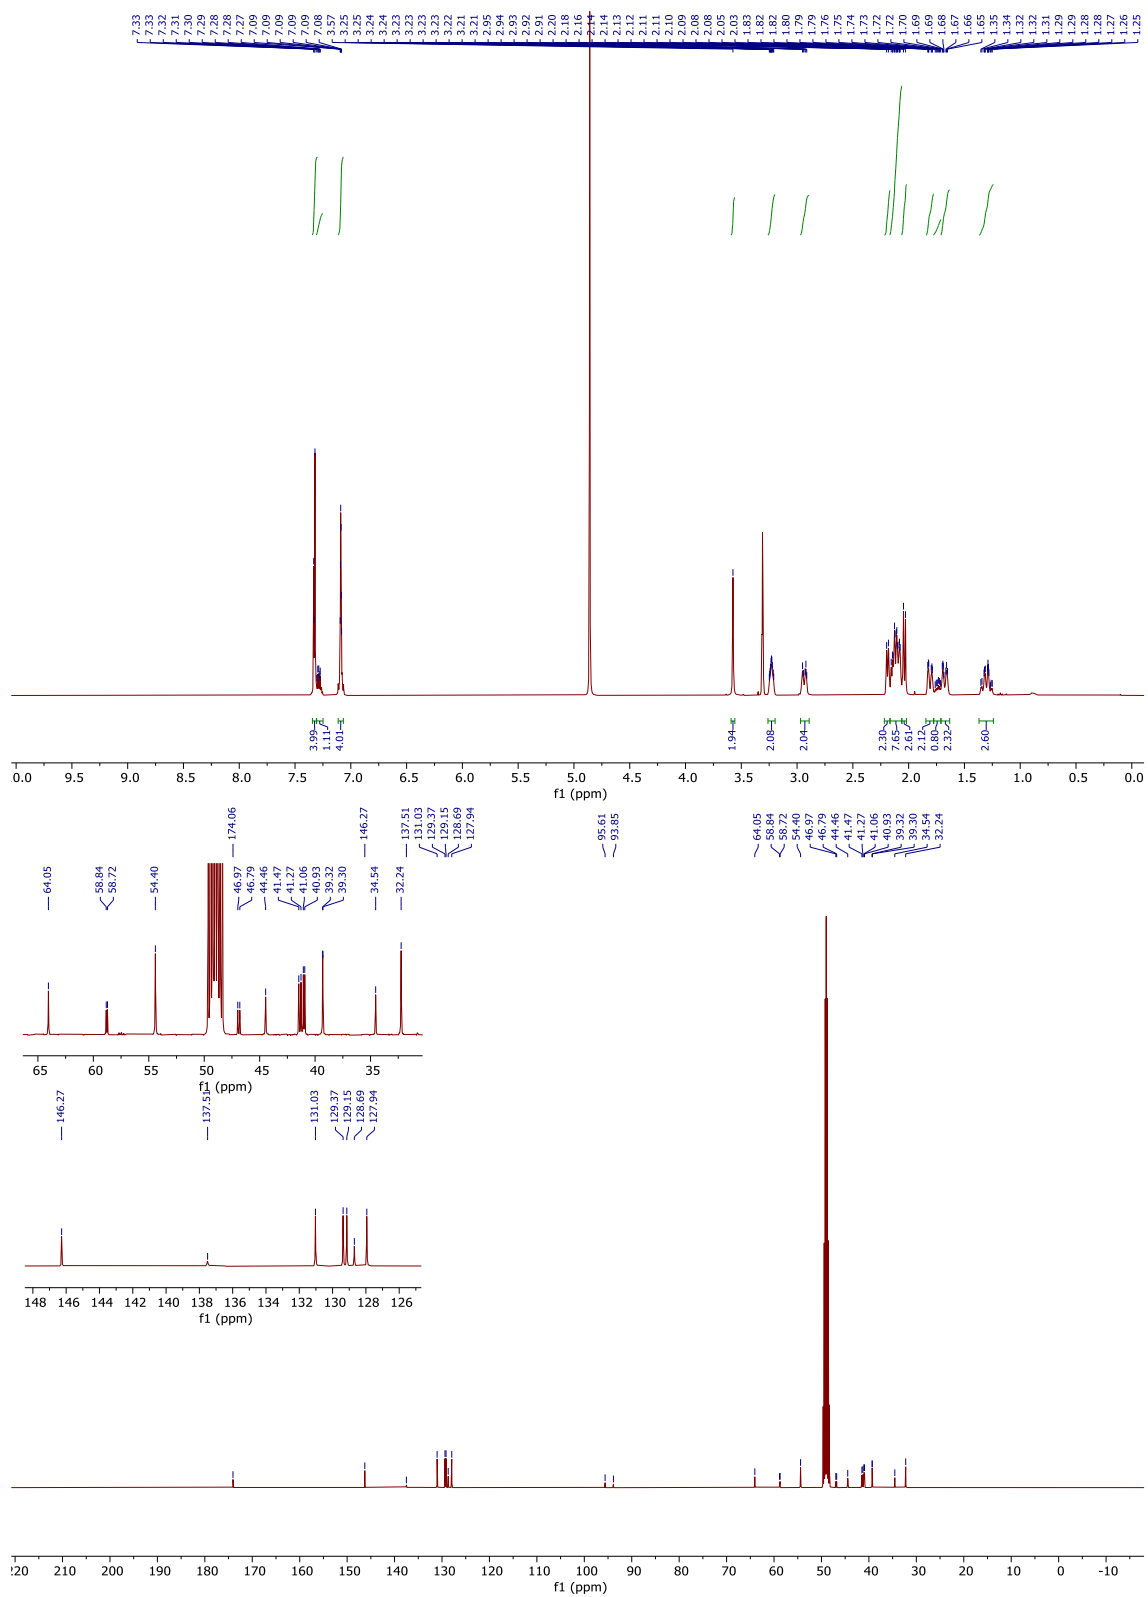

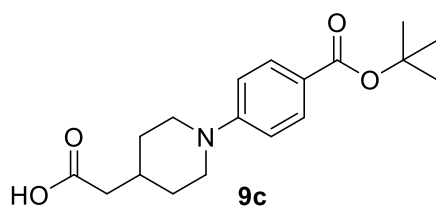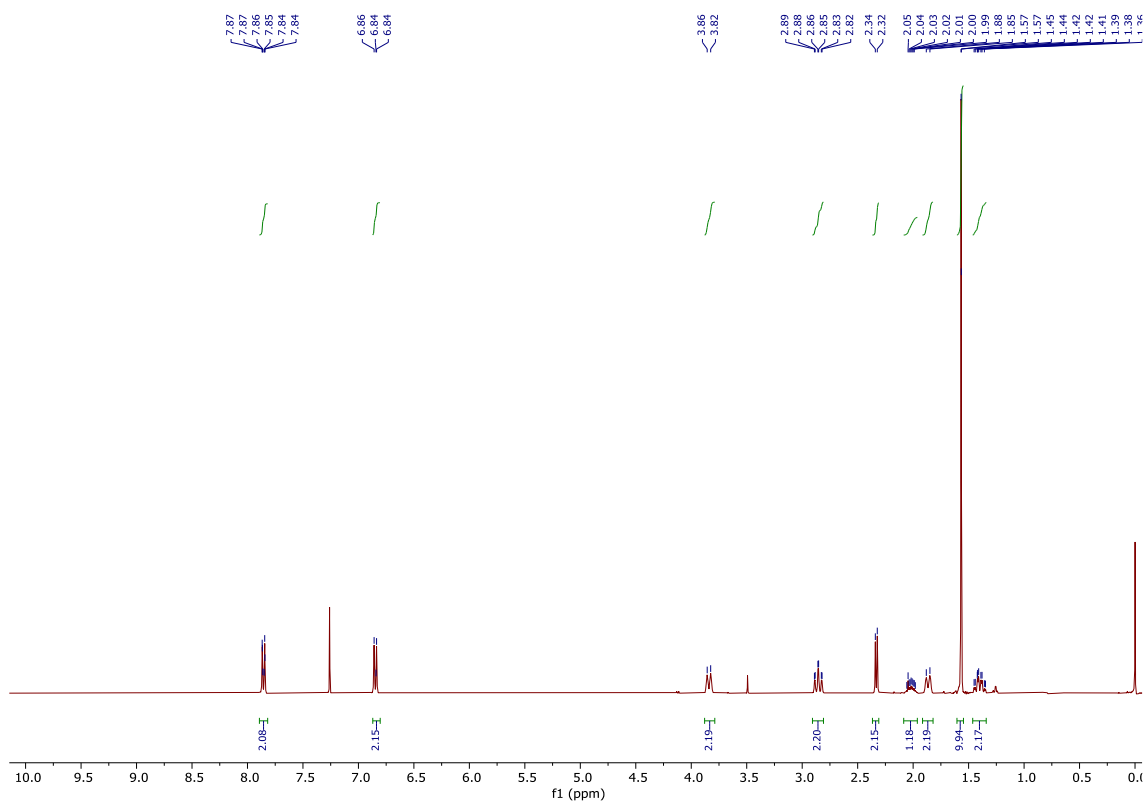

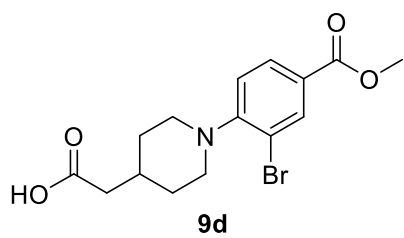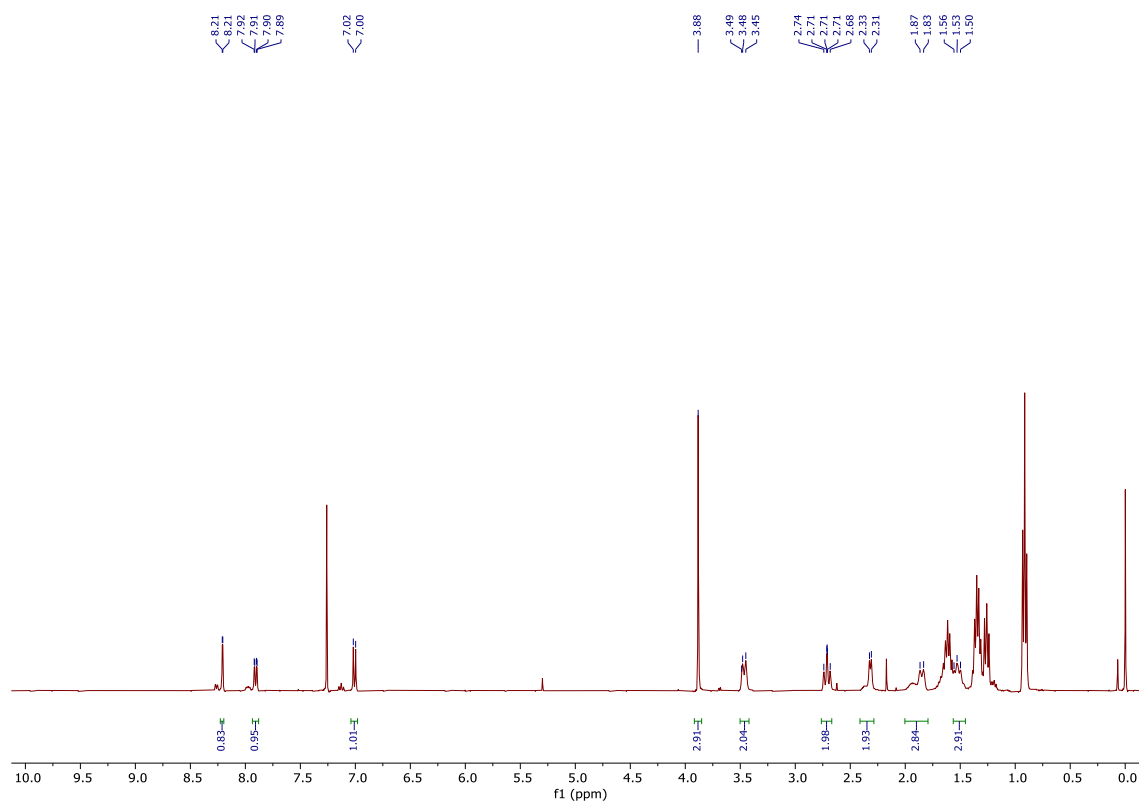

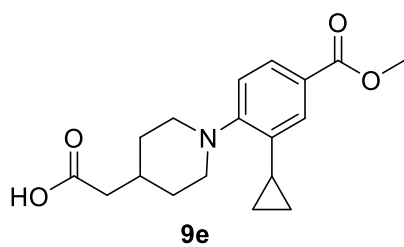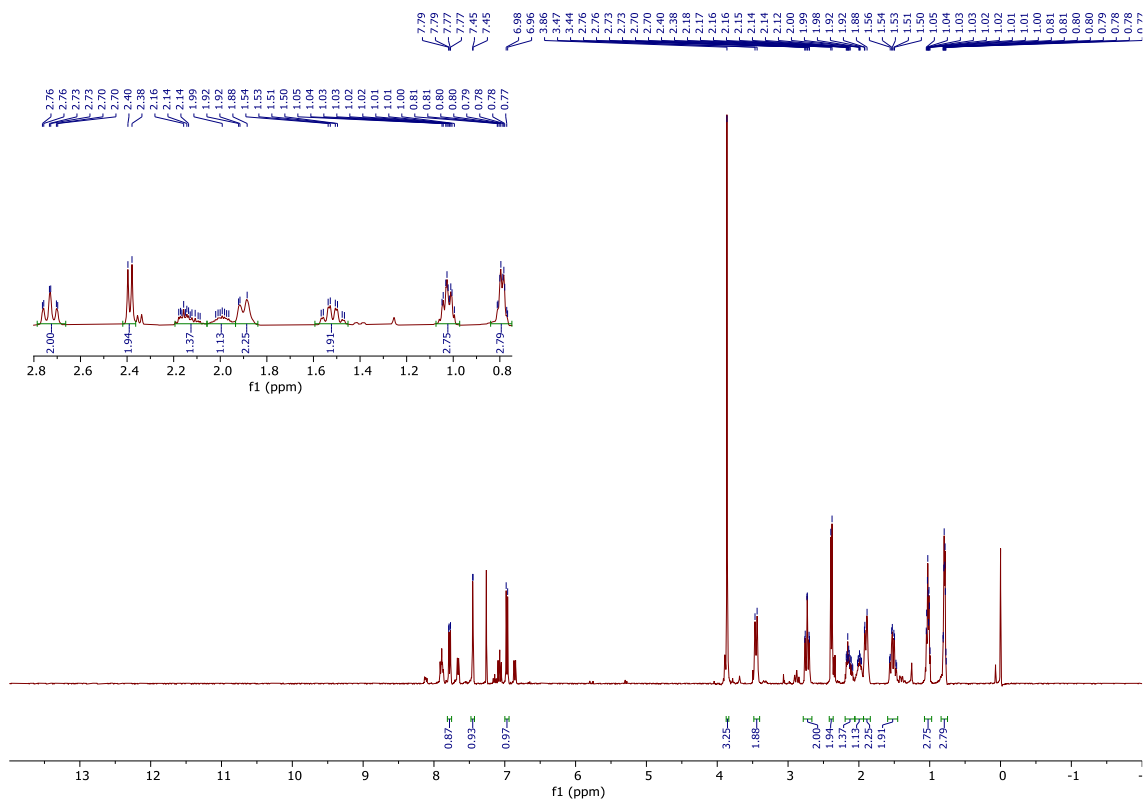





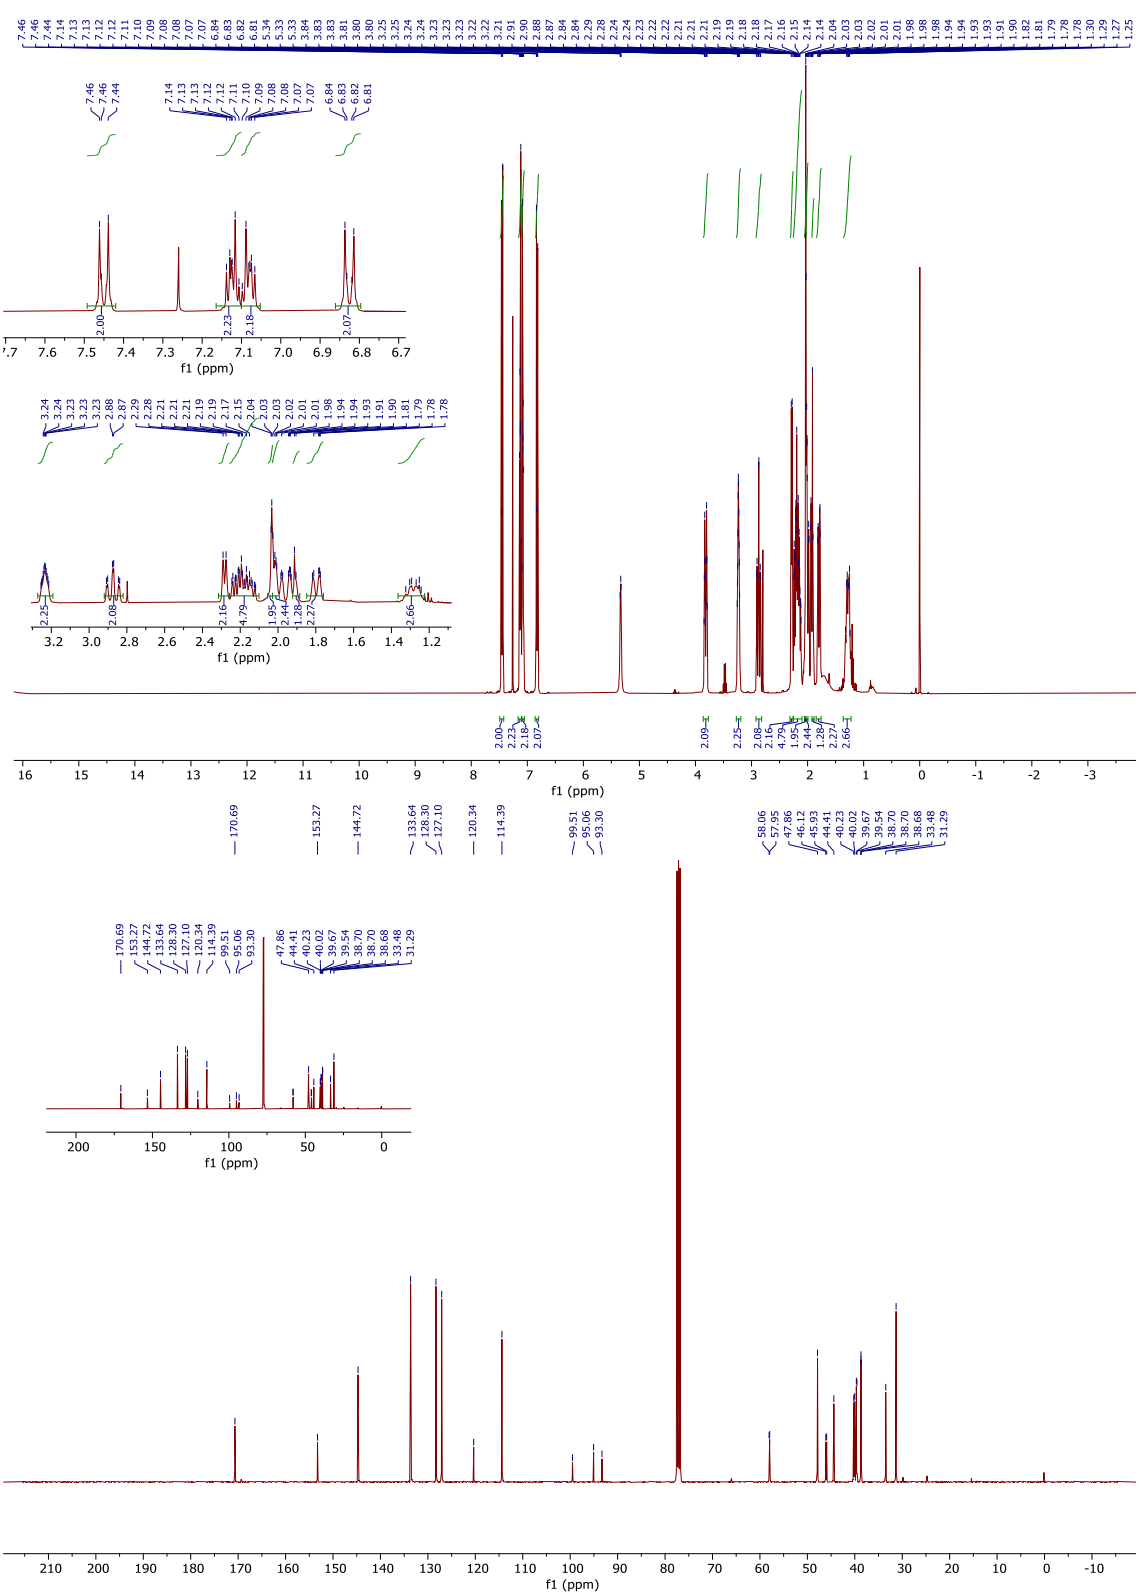

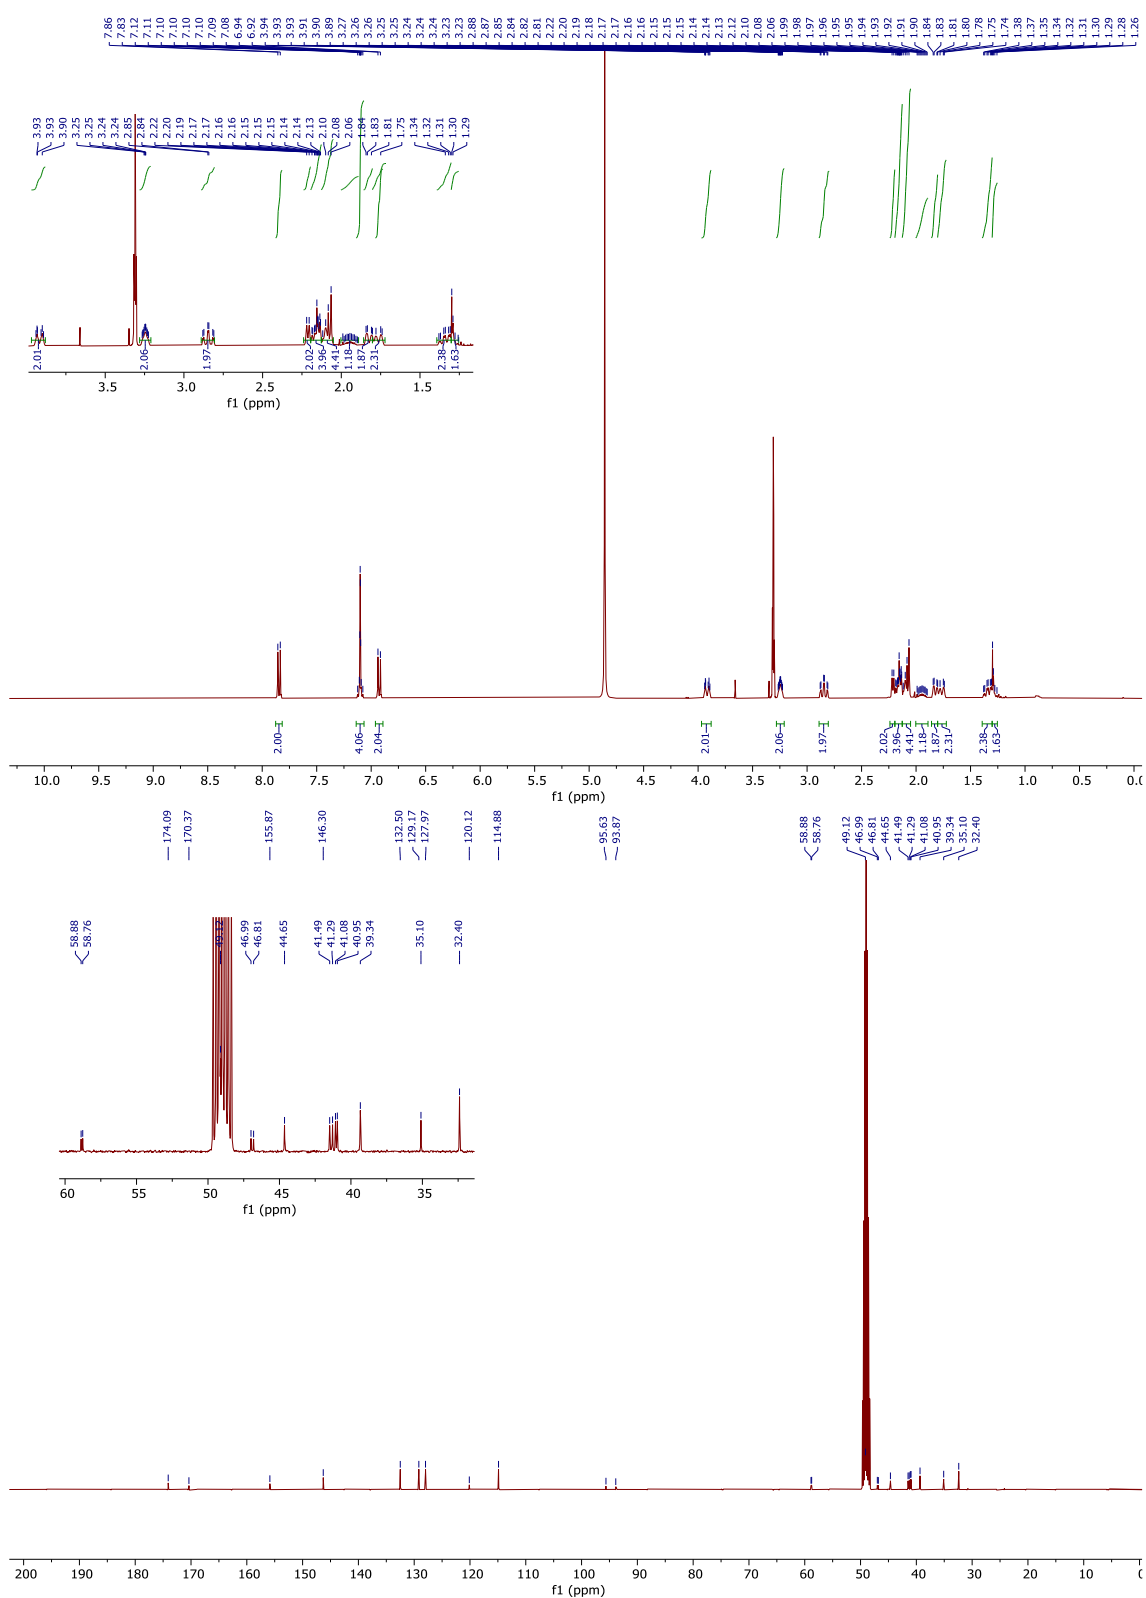

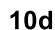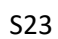

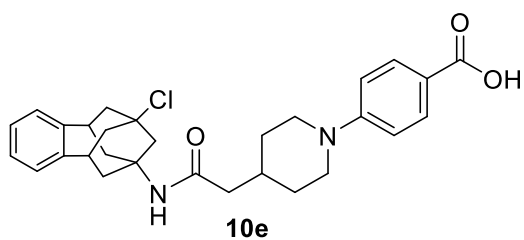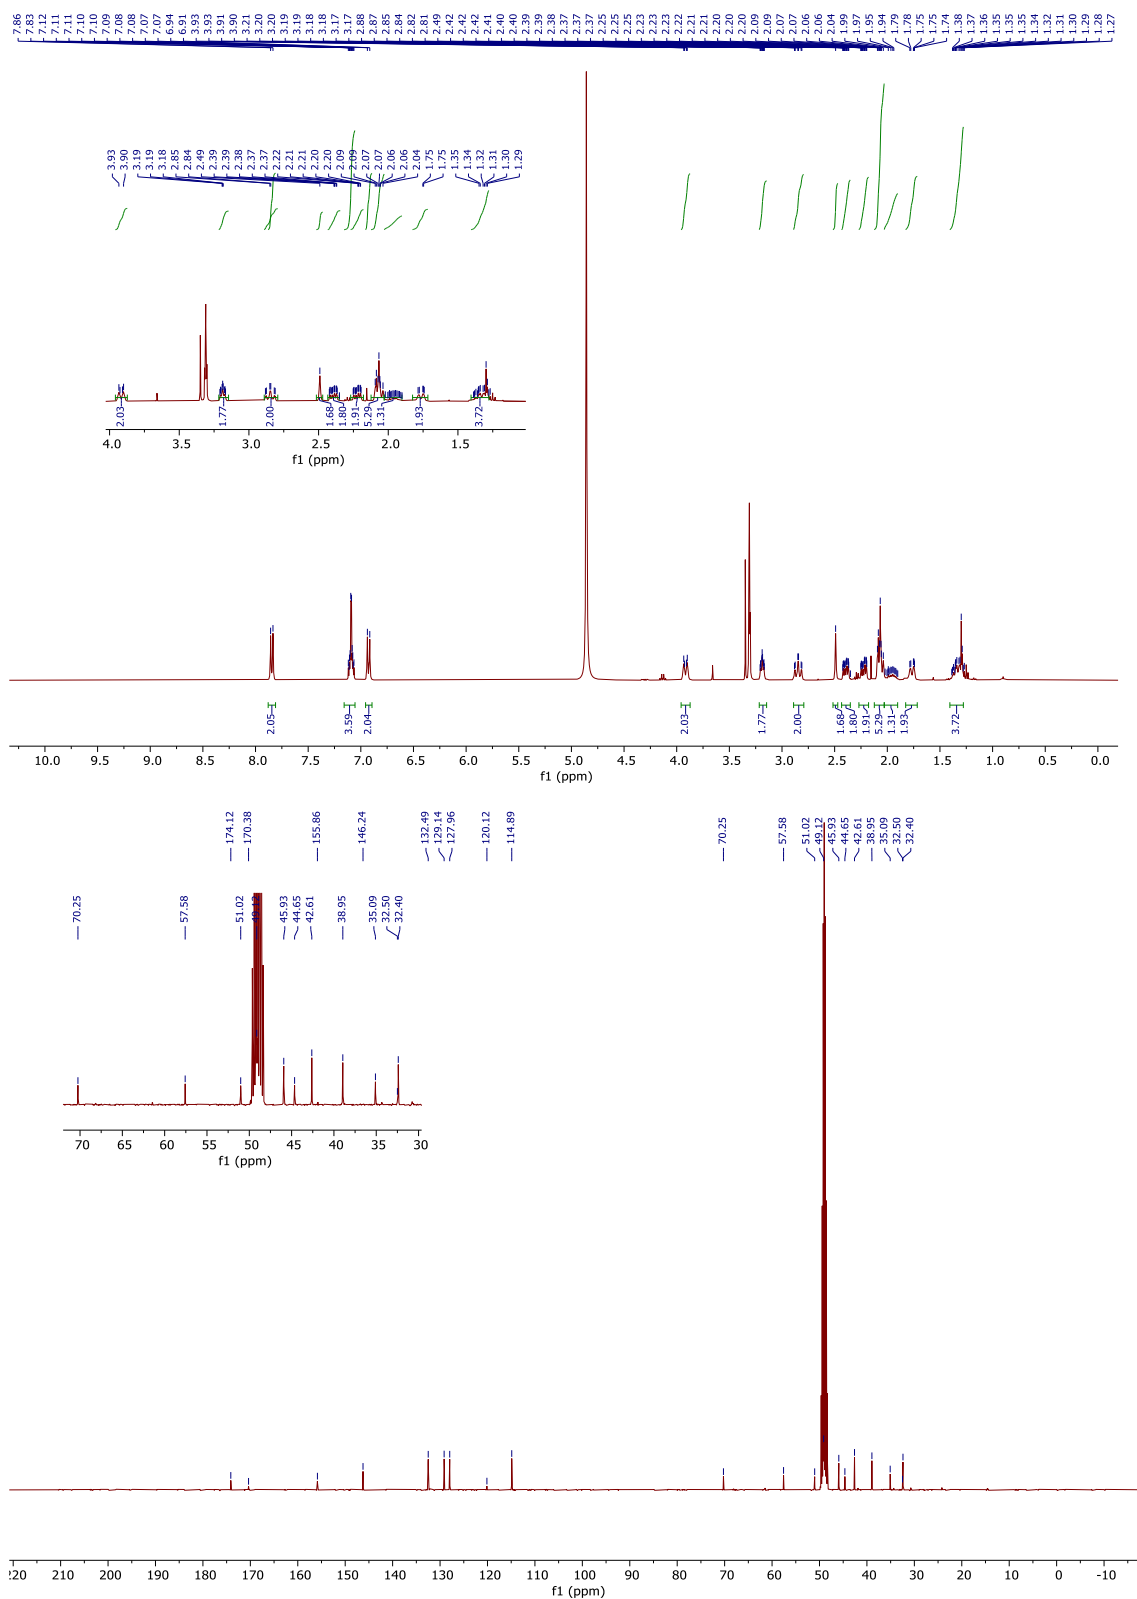

Supplement: s1 [file s1]
